# Supplementary material for: Rational Design and Characterisation of Novel Mono- and Bimetallic Antibacterial Linde Type A Zeolite Materials
Source: MDPI journal article supplement (doi:10.3390/jfb13020073), 2022-06-02
Supplement: s1 [file s1]

## SUPPORTING INFORMATION

### Content :

**Table S1.** Complementary information on the monometallic LTA-exchanged samples prepared, concentration of the exchange solution in metal ion [ $M^{n+}$ ], weight percentage of water measured by ATG, weight percentage of the metal measured by XRF and recalculated considering the water content, and molecular weight.

**Table S2.** Complementary information on the bimetallic LTA-exchanged samples prepared, concentration of the exchange solution in metal ion [ $M^{n+}$ ], weight percentage of water measured by ATG, weight percentage of the metal measured by XRF and recalculated considering the water content, and molecular weight.

**Figure S1.** SEM pictures recorded for Ag-LTA-3 (1.2 wt.% Ag) and Ag-LTA-7 (11.9 wt.% Ag). EDX analyses showing Ag distribution in Ag-LTA-3 (1.2 wt.% Ag) and Ag-LTA-7 (11.9 wt.% Ag).

**Figure S2.** Comparison of the XRD patterns recorded for Na-LTA and Ag-LTA-7.

**Table S1.** Complementary informations on the monometallic LTA-exchanged samples prepared, concentration of the exchange solution in metal ion  $[M^{n+}]$ , weight percentage of water measured by ATG, weight percentage of the metal measured by XRF and recalculated considering the water content, molecular weight.

| name     | $[M^{n+}]$<br>(M) | wt.% H <sub>2</sub> O<br>(ATG) | wt.% M<br>(XRF) | wt.% M<br>(hyd) | MW (g/mol) |
|----------|-------------------|--------------------------------|-----------------|-----------------|------------|
| Na-LTA   | 0                 | 20.7                           | 0               | 0               | 2193       |
| Ag-LTA-1 | 0.001             | 20.8                           | 0.2             | 0.1             | 2171       |
| Ag-LTA-2 | 0.005             | 20.5                           | 0.8             | 0.6             | 2188       |
| Ag-LTA-3 | 0.01              | 20.4                           | 1.6             | 1.2             | 2200       |
| Ag-LTA-4 | 0.02              | 20.2                           | 3.4             | 2.7             | 2230       |
| Ag-LTA-5 | 0.037             | 19.0                           | 6.6             | 5.3             | 2250       |
| Ag-LTA-6 | 0.05              | 19.6                           | 7.7             | 6.2             | 2280       |
| Ag-LTA-7 | 0.1               | 18.2                           | 15.1            | 11.9            | 2352       |
| Cu-LTA-1 | 0.005             | 20.6                           | 0.5             | 0.4             | 2188       |
| Cu-LTA-2 | 0.01              | 21.0                           | 1.0             | 0.8             | 2213       |
| Cu-LTA-3 | 0.025             | 21.1                           | 3.2             | 2.5             | 2228       |
| Cu-LTA-4 | 0.05              | 21.8                           | 6.0             | 4.7             | 2249       |
| Zn-LTA-1 | 0.005             | 20.3                           | 0.6             | 0.5             | 2170       |
| Zn-LTA-2 | 0.01              | 20.6                           | 1.1             | 0.9             | 2177       |
| Zn-LTA-3 | 0.025             | 20.0                           | 3.1             | 2.5             | 2193       |
| Zn-LTA-4 | 0.05              | 20.4                           | 5.7             | 4.6             | 2226       |

**Table S2.** Complementary informations on the bimetallic LTA-exchanged samples prepared, concentration of the exchange solution in metal ion  $[M^{n+}]$ , weight percentage of water measured by ATG, weight percentage of the metal measured by XRF and recalculated considering the water content, molecular weight.

| name                        | $M^{n+}$ | $[M^{n+}]$<br>(M) | wt.% H <sub>2</sub> O<br>(ATG) | wt.% M<br>(XRF) | wt.% M<br>(hyd) | MW (g/mol) |
|-----------------------------|----------|-------------------|--------------------------------|-----------------|-----------------|------------|
| CuAg-LTA-1                  | Cu       | 0.01              | 20.4                           | 0.8             | 0.7             | 2189       |
|                             | Ag       | 0.01              |                                | 1.5             | 1.2             |            |
| AgCu-LTA-1                  | Ag       | 0.01              | 20.4                           | 1.5             | 1.2             | 2203       |
|                             | Cu       | 0.01              |                                | 1.1             | 0.9             |            |
| ZnAg-LTA-1                  | Zn       | 0.01              | 20.0                           | 1.1             | 0.9             | 2203       |
|                             | Ag       | 0.01              |                                | 1.9             | 1.5             |            |
| AgZn-LTA-1                  | Ag       | 0.01              | 19.9                           | 1.8             | 1.4             | 2201       |
|                             | Zn       | 0.01              |                                | 1.3             | 1.1             |            |
| Zn <sub>0.05</sub> Ag-LTA-2 | Zn       | 0.05              | 20.0                           | 4.8             | 3.9             | 2240       |
|                             | Ag       | 0.01              |                                | 1.6             | 1.3             |            |
| AgZn <sub>0.05</sub> -LTA-2 | Ag       | 0.01              | 19.9                           | 1.5             | 1.2             | 2226       |
|                             | Zn       | 0.05              |                                | 4.9             | 3.9             |            |

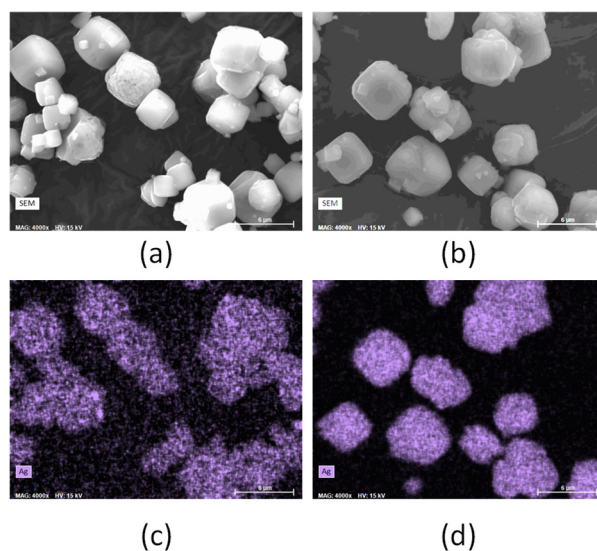

**Figure S1.** SEM pictures recorded for **(a)** Ag-LTA-3 (1.2 wt.% Ag) and **(b)** Ag-LTA-7 (11.9 wt.% Ag). EDX analyses showing Ag distribution in **(c)** Ag-LTA-3 (1.2 wt.% Ag) and **(d)** Ag-LTA-7 (11.9 wt.% Ag).

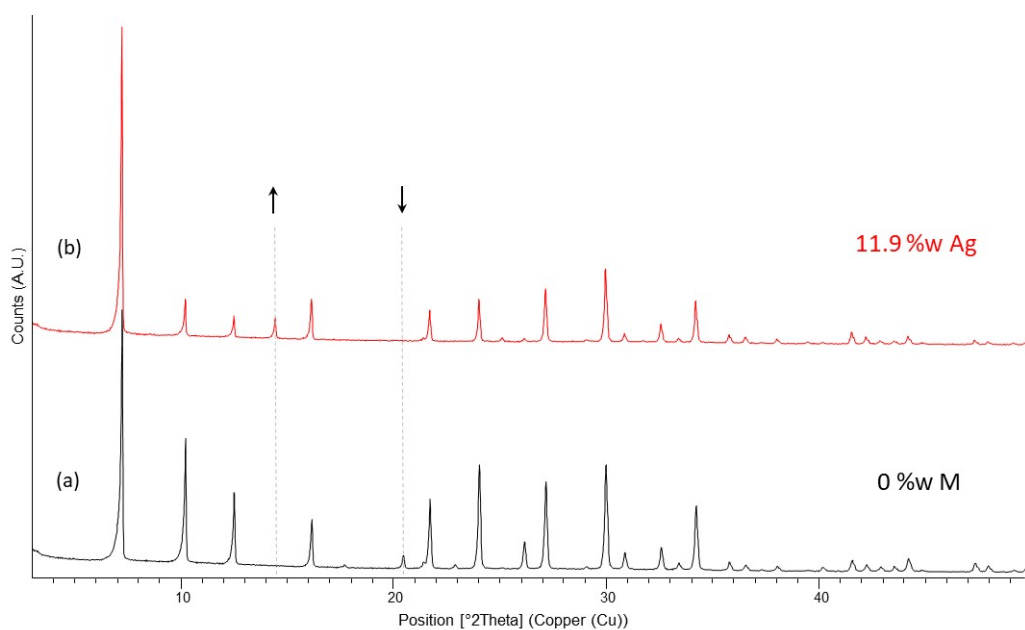

**Figure S2.** Comparison of the XRD patterns recorded for **(a)** Na-LTA and **(b)** Ag-LTA-7.
